# Supplementary material for: Electronic transport properties of the first all-boron fullerene B40and its metallofullerene Sr@B40
Source: Royal Society of Chemistry journal article supplement (doi:10.1039/c6cp01096b), 2016-01-01
Supplement: c6cp01096b1.pdf [file c6cp01096b1.pdf]

## Supplementary Information for

### **Electronic transport properties of the first all-boron fullerene $B_{40}$ and its metallofullerene $Sr@B_{40}$**

Yipeng An,<sup>\*a</sup> Mengjun Zhang,<sup>a</sup> Dapeng Wu,<sup>b</sup> Zhaoming Fu,<sup>ac</sup> Tianxing Wang<sup>a</sup> and Congxin Xia<sup>a</sup>

*<sup>a</sup>College of Physics and Materials Science, Henan Normal University, Xixiang 453007, China.*

*E-mail address: [ypa@htu.edu.cn](mailto:ypa@htu.edu.cn).*

*<sup>b</sup>School of Chemistry and Chemical Engineering, Henan Normal University, Xixiang 453007, China*

*<sup>c</sup>Beijing National Laboratory for Condensed Matter Physics, Institute of Physics, Chinese Academy of Sciences, Beijing 100190, China*

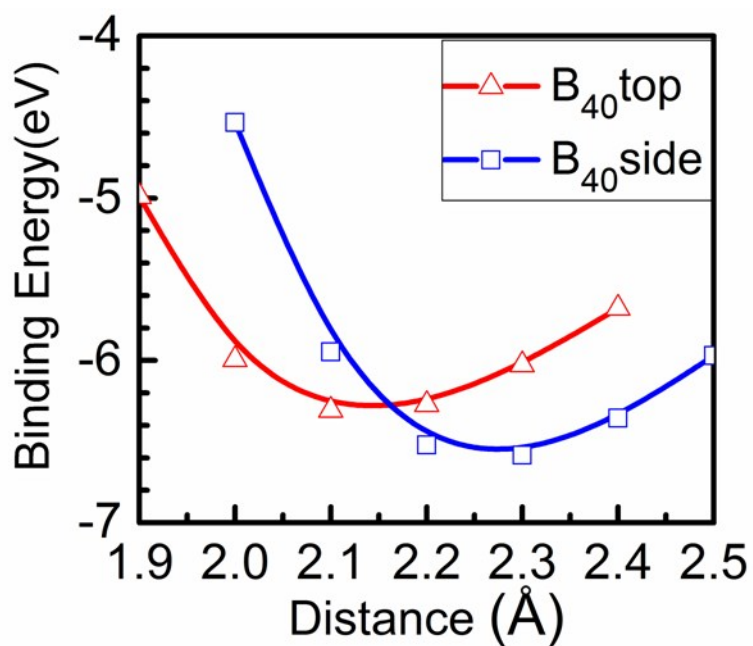

**Fig. S1** Evolution of binding energies of the top- and side-contact for  $B_{40}$  with different contact distances.

The evolution of binding energies of the top- and side-contact for  $B_{40}$  with different contact distances are plotted Fig. S1. All the binding energies are negative, thus corresponding to a stable system. The evolutions of binding energy and total energy (shown in Fig. 2(b)) for  $B_{40}$  have the same trend, confirming the preferred contact structures.

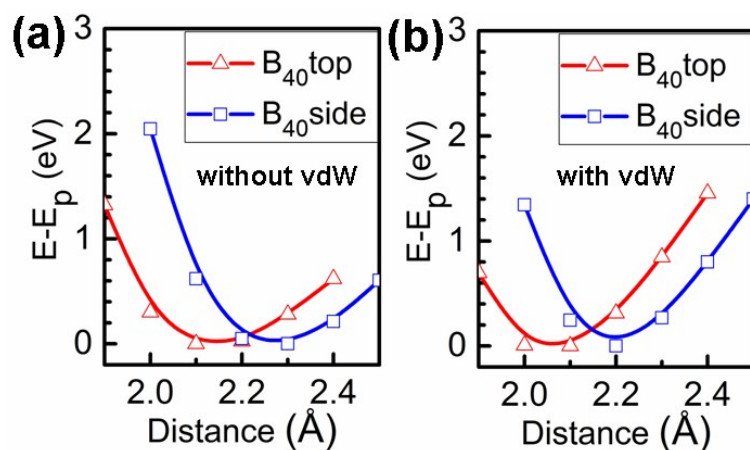

**Fig. S2** Evolution of energies of  $B_{40}$  junctions with different contact distances, without (a) and with (b) van der Waals (VDW) interactions.

Fig. S2 gives the evolution of total free-energy of  $B_{40}^{top}$  and  $B_{40}^{side}$  junctions under the various contact distances, with and without considering the VDW interactions (based on the DFT-D3 method). There is no or little change of the preferred contact distance for  $B_{40}$  junctions when considering the VDW interactions. Namely, the preferred contact distance for  $B_{40}^{top}$  junction is still 2.1 Å with or without considering the VDW interactions. That changes from 2.3 to 2.2 Å for  $B_{40}^{side}$  junction when considering the VDW interactions, while giving rise to little change to the conclusions in the manuscript.
